# Supplementary material
Source: publisher site journal article supplement (https://en-cdn.bio-protocol.org/attached/file/20210105/Appendix.docx)
Supplement: Supplementary file 1 [file Appendix.docx]

**Appendix**

The PulseSPEL program for the PELDOR experiment is given below. In order to use it, copy the code into a plain text file and save it under the file name “PELDOR.exp”.

; Double Electron-Electron Resonance

; PulseSPEL pulse programs, phase programs & dimensions

; Dimensions

; -------------------------------------------

begin defs ; dimension of data array [sx,sy]

dim s[256] ; for 2P ESE Setup

dim1 s[256] ; for 2P Field Sweep

dim2 s[256] ; for 3P ELDOR Setup

dim3 s[100] ; for 3P ELDOR Nutation

dim4 s[256] ; for 4P DEER Setup

dim5 s[379] ; for 4P DEER sx=(d1+d2-2*d3)/d30

end defs

; Phase cycling programs

; -------------------------------------------

begin lists "+<x> none"

ph1 +<x>

ph2 +<x>

asg1 +a

bsg1 +b

end lists

begin lists1 "-<x> none"

ph1 -<x>

ph2 -<x>

asg1 +a

bsg1 +b

end lists1

begin lists2 "2-step"

ph1 +<x> -<x>

ph2 +<x>

asg1 +a -a

bsg1 +b -b

end lists2

; PulseSPEL Programs

; Standing 2-pulse Hahn echo

; -------------------------------------------

begin exp "2P ESE Setup" [TRANS QUAD]

shot i=1 to h ; accumulation loop

d9 ; DAF

p0 [ph1] ; 1st pulse

d1 ; tau1

p1 [ph2] ; 2nd pulse

d1 ; tau1

d0 ; acquistion delay

dig [sg1] ; acquisition

next i ; end of accumulation loop

end exp

; 2-pulse Field Sweep

; -------------------------------------------

begin exp1 "2P Field Sweep" [INTG QUAD]

for k=1 to n ; averaging loop

totscans(n) ; output of total number of scans

bsweep x=1 to sx ; field sweep loop

shot i=1 to h ; accumulation loop

d9 ; DAF

p0 [ph1] ; 1st pulse

d1 ; tau1

p1 [ph2] ; 2nd pulse

d1 ; tau1

d0 ; acquistion delay

acq [sg1] ; acquisition

next i ; end of accumulation loop

next x ; end of field sweep loop

scansdone(k) ; output of scans done

next k ; end of averaging loop

end exp1

; Standing 3-pulse Echo

; -------------------------------------------

begin exp2 "3P ELDOR Setup" [TRANS QUAD]

shot i=1 to h ; accumulation loop

d9 ; DAF

p2 [ELDOR] ; 1st pulse

d4 ; T

p0 [ph1] ; 2nd pulse

d1 ; tau1

p1 [ph2] ; 3d pulse

d1 ; tau1

d0 ; acquistion delay

dig [sg1] ; acquisition

next i ; end of accumulation loop

end exp2

; Pump Pulse Optimization

; -------------------------------------------

begin exp3 "3P ELDOR Nutation" [SPT QUAD]

for k=1 to n ; averaging loop

totscans(n) ; output of total number of scans

dx=p3 ; define time axis

p4=p3 ; initial pump pulse length

d5=d4 ; initial T

sweep x=1 to sx ; sweep loop

shot i=1 to h ; accumulation loop

d9 ; DAF

p4 [ELDOR] ; 1st pulse

d5 ; T

p0 [ph1] ; 2nd pulse

d1 ; tau1

p1 [ph2] ; 3d pulse

d1 ; tau1

d0 ; acquistion delay

acq [sg1] ; acquisition

next i ; end of accumulation loop

dx=dx+d6 ; define time axis increment

p4=p4+d6 ; increment pump pulse length

d5=d5+d6 ; increment T

next x ; end of sweep loop

scansdone(k) ; output of scans done

next k ; end of averaging loop

end exp3

; Standing 4-pulse DEER

; -------------------------------------------

begin exp4 "4P DEER Setup" [TRANS QUAD]

shot i=1 to h ; accumulation loop

d9 ; DAF

p0 [ph1] ; 1st pulse

d1 ; tau1

p1 [ph2] ; 2nd pulse

d1 ; tau1

p2 [ELDOR] ; 1st pulse

d2 ; tau2

p1 [ph2] ; 3d pulse

d2 ; tau2

d0 ; acquistion delay

dig [sg1] ; acquisition

next i ; end of accumulation loop

end exp4

; 4-pulse DEER

; -------------------------------------------

begin exp5 "4P DEER" [INTG QUAD]

for k=1 to n ; averaging loop

totscans(n) ; output of total number of scans

d10=d1 ; initial tau1

d13=d3 ; initial deadtime delay

for j=1 to m ; tau1 averaging loop

dx=0 ; define time axis

d11=d13 ; tau1 + initial t

d12=d1+d2 ;

d12=d12-d3 ; tau2 - initial t

sweep x=1 to sx ; sweep loop

shot i=1 to h ; accumulation loop

d9 ; DAF

p0 [ph1] ; 1st pulse

d10 ; tau1

p1 [ph2] ; 2nd pulse

d11 ; tau1

p2 [ELDOR] ; 1st pulse

d12 ; tau2

p1 [ph2] ; 3d pulse

d2 ; tau2

d0 ; acquistion delay

acq [sg1] ; acquisition

next i ; end of accumulation loop

dx=dx+d30 ; define time axis increment

d11=d11+d30 ; tau1 + t

d12=d12-d30 ; tau2 - t

next x ; end of sweep loop

d10=d10+d31 ; increment tau1

d13=d13+d31 ; increment initial deadtime delay

next j ; end of tau1 averaging loop

scansdone(k) ; output of scans done

next k ; end of averaging loop

end exp5

An example of the variable definitions is given below. In order to use it, copy the code into a plain text file and save it under the file name “PELDOR_variable_definitions.def”.

; Double Electron-Electron Resonance

; PulseSPEL general variables, definitions & conventions

;

begin defs

; Variables ; Comments

p0 = 12 ; 90 pulse length, pi/2

p1 = 24 ; 180 pulse length, pi

p2 = 16 ; pump pulse length

p3 = 2 ; the shortest accessible p2

p4 = 2 ; same as p3 (superseeded)

pg = 24 ; Integrator Gate Width

d0 = 360 ; Detection Trigger offset time

d1 = 232 ; tau1

d2 = 3000 ; tau2

d3 = 100 ; deadtime delay between probe pi-pulse and first position of pump pulse

d4 = 400 ; T for pump pulse optimization

d5 = 500 ; same as d4 (superseeded)

d6 = 2 ; increment for pump pulse length

d9 = 0 ; DAF (Delay After Flash)

d10 = 232 ; same as tau1 (superseeded)

d11 = 100 ; same as deadtime delay(superseeded)

d12 = 3232 ; same as (tau1 + tau2 - deadtime delay) (superseeded)

d13 = 100 ; same as deadtime delay (superseeded)

d30 = 8 ; 1st time scale increment

d31 = 16 ; 2nd time scale increment (for modulation averaging)

a = 50 ; number of transient averages (TRANS)

h = 10 ; number of shots per point (INTG and SPT)

n = 1 ; number of sweeps to accumulate

m = 8 ; number of tau1 increments (for modulation averaging)

srt = 3000 * srtu ; (RESERVED) SRT - Shot Repetition Time (srtu=1.02 us)

b = 1 ;

c = 1 ;

r = 1 ;

w = 180 ; Split point of sweeps (points), *i.e.* pulse separation where TWT gate pulse can be split

s = 300 ; Sweep length (n. of data really taken) ( counter: X )

t = 1 ; Second time axsis sweep length ( counter: Y )

dx = 0 ; 1st time scale starting value

dy = 0 ; 2nd time scale starting value

end defs
